# Supplementary material
Source: Springer Nature journal article supplement (https://www.springermedizin.de/resource/supplementary/12885_2007_869_MOESM16_ESM.pdf/9470540)
Supplement: MOESM16 [file 9470540]

OMRF 7T/30

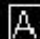

BRUKER spect

RS\_7

Date: 1 Aug 2005

RS\_7

Time: 16:50

\*  
M 5.0 kg

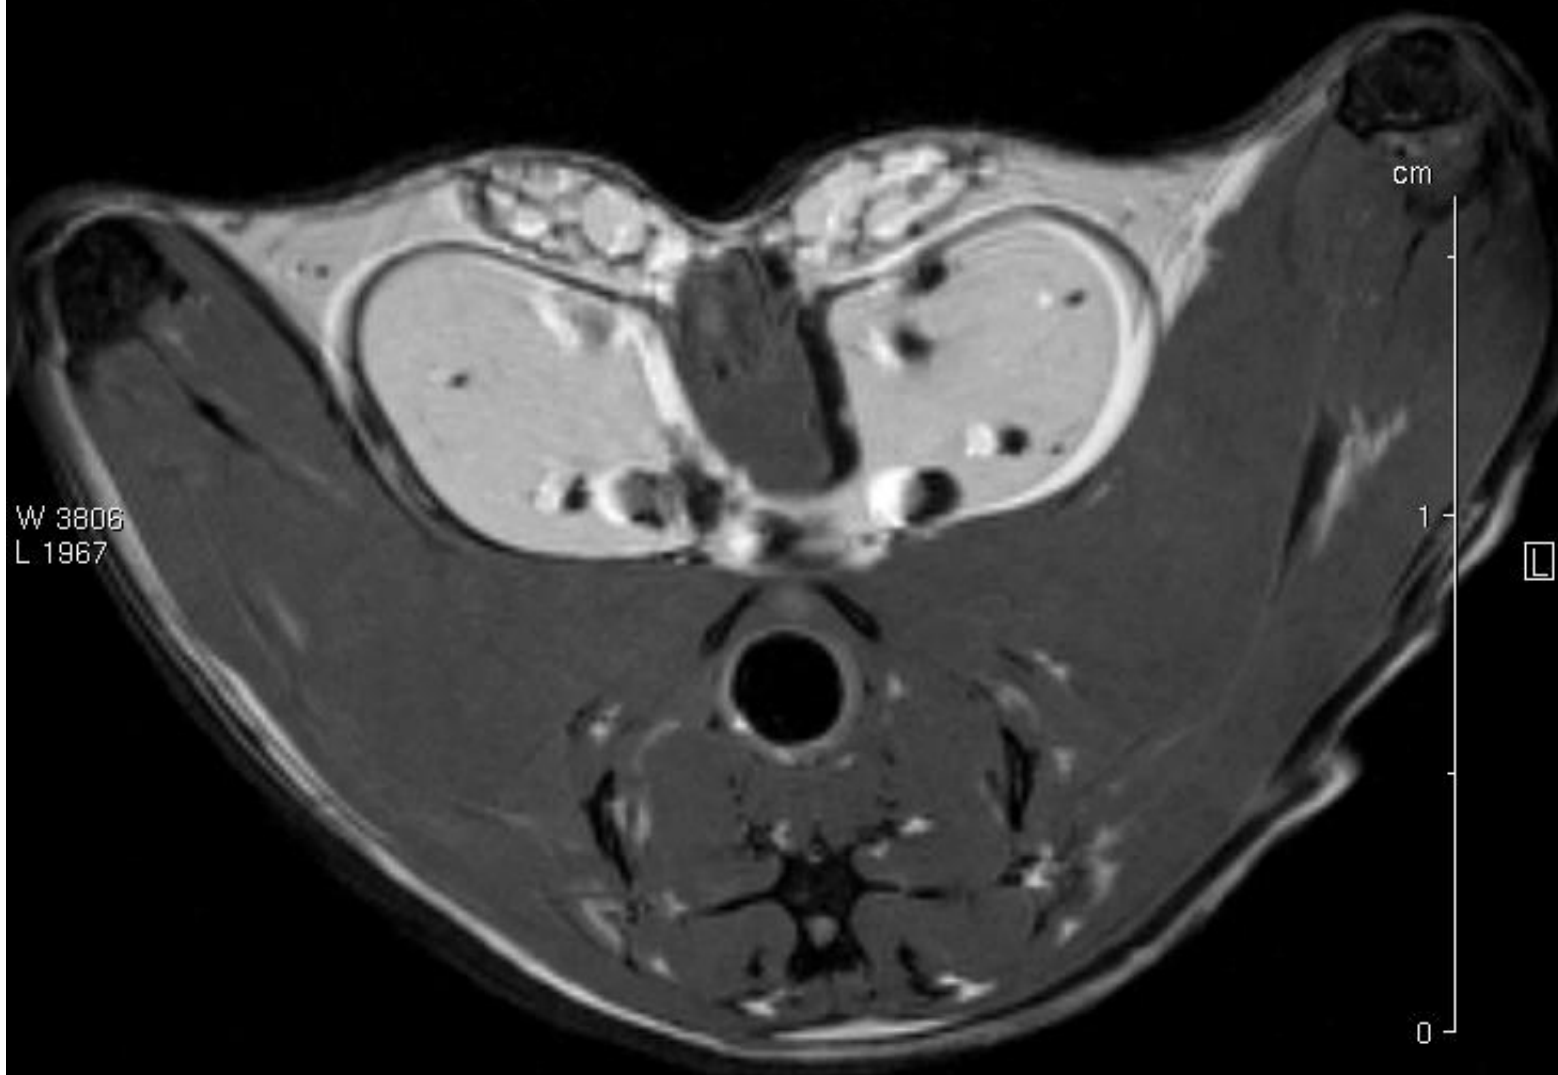

W 3806  
L 1967

Scan: 3  
Slice: 1/17  
Echo: 1/2  
MSME (pvm)  
TR: 1285.5 ms  
TE: 17.4 ms  
NEX 4

SI 0.50/0.55 mm  
FOV 3.0 cm  
MTX 256

Pos -5.00 mm F  
bladder MRI: 1  
OMRF\_double\_echo, 3 : 1
